# Supplementary material for: POLB Regulates Proliferation and Apoptosis of Bovine Primary Myocytes
Source: MDPI journal article supplement (doi:10.3390/ani14091323), 2024-04-28
Supplement: s1 [file s1]

# Supplementary Materials for

## POLB regulates proliferation and apoptosis of bovine primary myocytes

Geyang Zhang<sup>1,2,†</sup>, Jiamei Wang<sup>3,†</sup>, Yulong Li<sup>1</sup>, Zijing Zhang<sup>1</sup>, Xiangnan Wang<sup>1</sup>, Fuying Chen<sup>1</sup>, Qiaoting Shi<sup>1</sup>, Yongzhen Huang<sup>3</sup>, Eryao Wang<sup>1,\*</sup> and Shijie Lyu<sup>1,4,\*</sup>

### Affiliations:

1 Institute of Animal Husbandry and Veterinary Science, Henan Academy of Agricultural Sciences, Zhengzhou, Henan 450002, China

2 College of Animal Science and Veterinary Medicine, Henan Agricultural University, Zhengzhou, Henan 450046, China

3 College of Animal Science and Technology, Northwest A&F University, Yangling 712100, China

4 The Shennong Laboratory, Zhengzhou, Henan 450002, China

\*Correspondence: Shijie Lyu: sjlyu@outlook.com; Eryao Wang: eryaowang@outlook.com

† These authors contributed equally to the work.

### This PDF file includes:

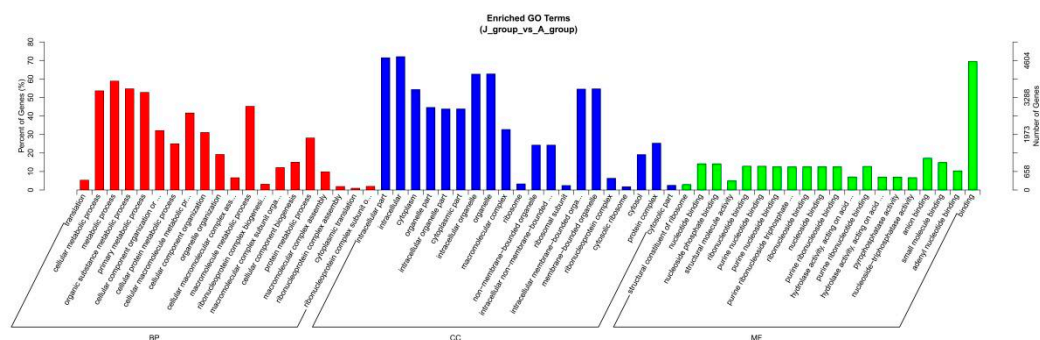

**Figure S1.GO enrichment results**

Note: BP represents biological processes, CC represents cellular components, and MF represents molecular functions.

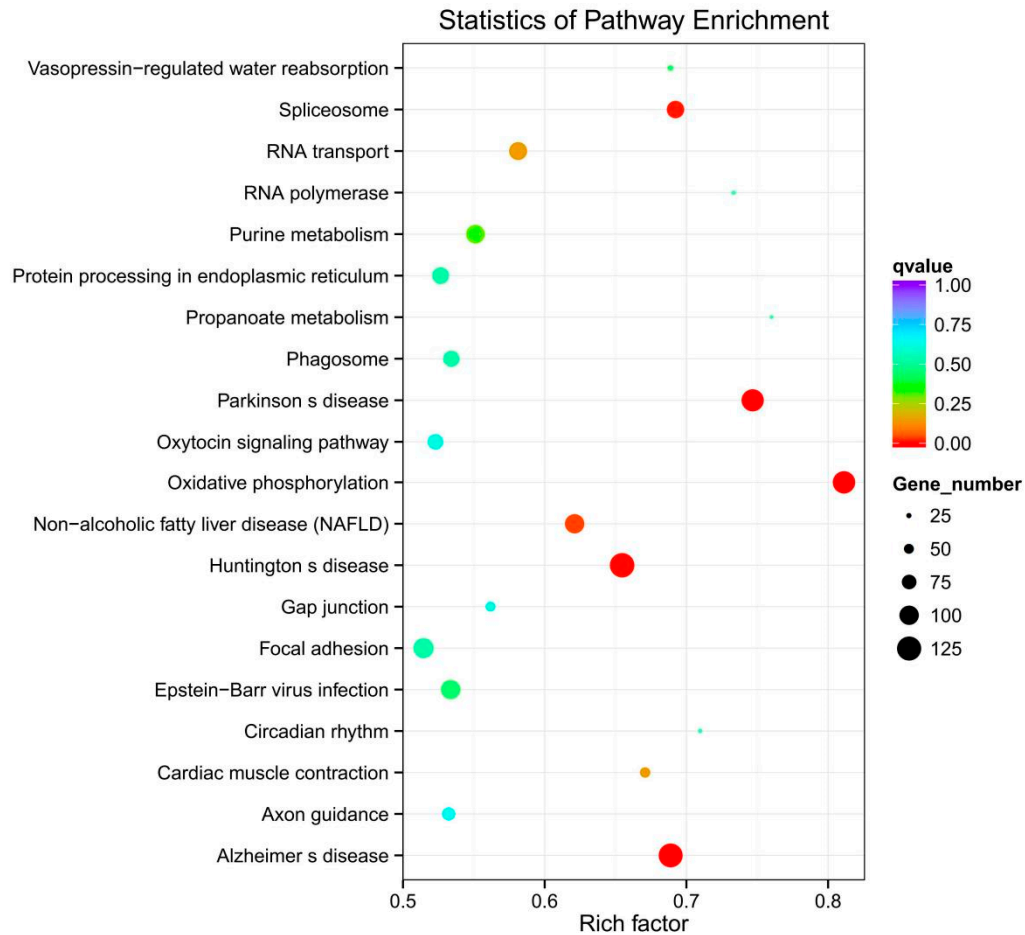

**Figure S2.KEGG Pathway Enrichment Map**

Note: The size of the circle represents the number of genes enriched in the corresponding pathway, and the larger the circle, the more genes enriched in the pathway; The color represents the enrichment significance, the closer to red, the more remarkable.

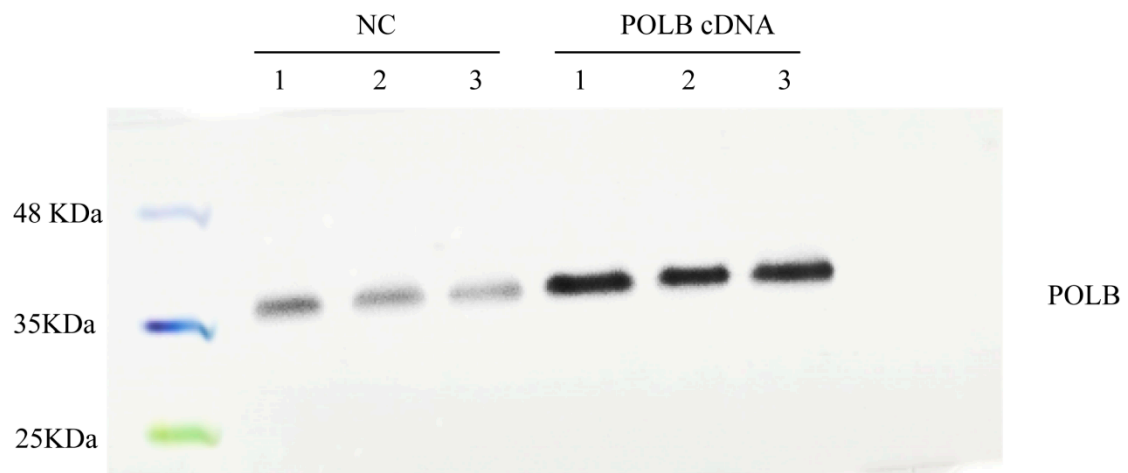

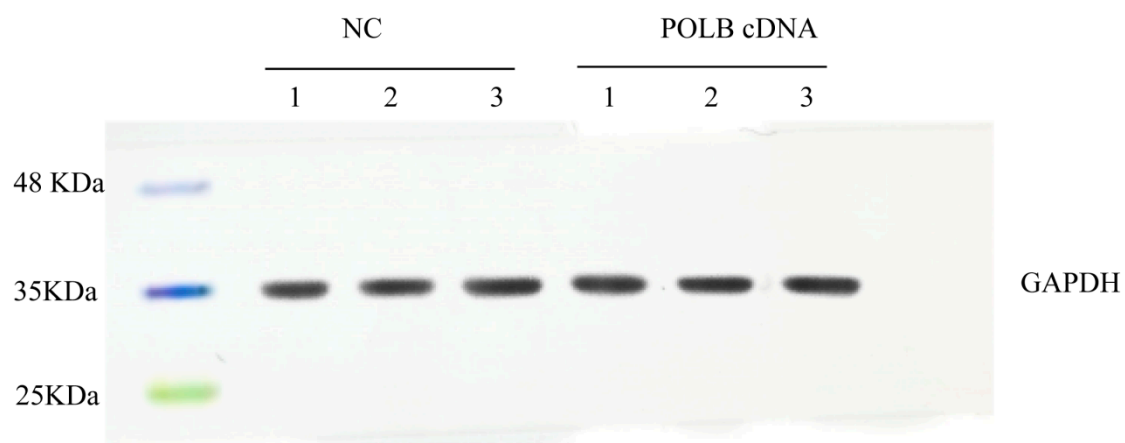

**Figure S3.** Expression changes of POLB and GAPDH proteins with a negative control (NC) and POLB cDNA construct in bovine primary myocytes.

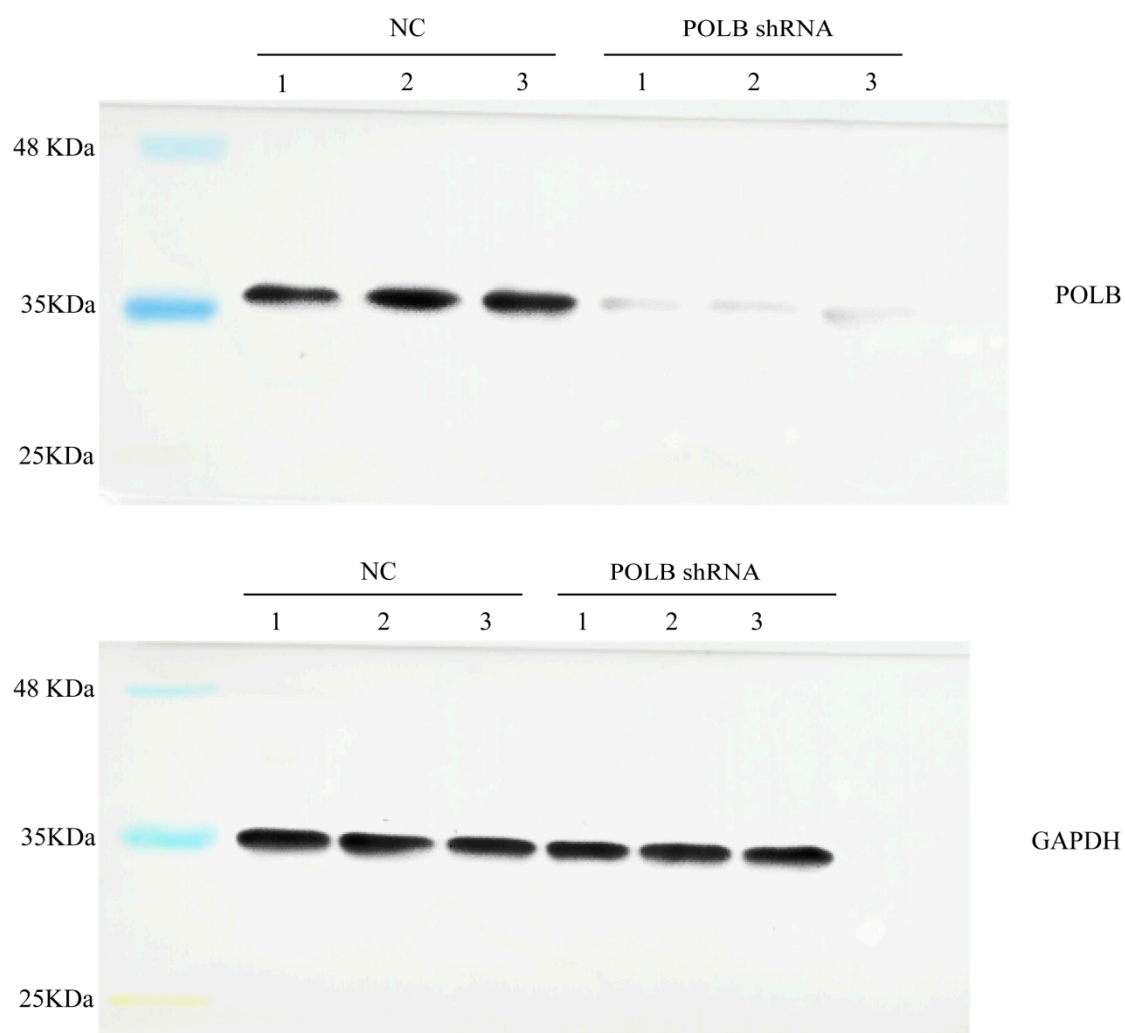

**Figure S4.** Expression changes of POLB and GAPDH proteins with a negative control (NC) and POLB shRNA construct in bovine primary myocytes.

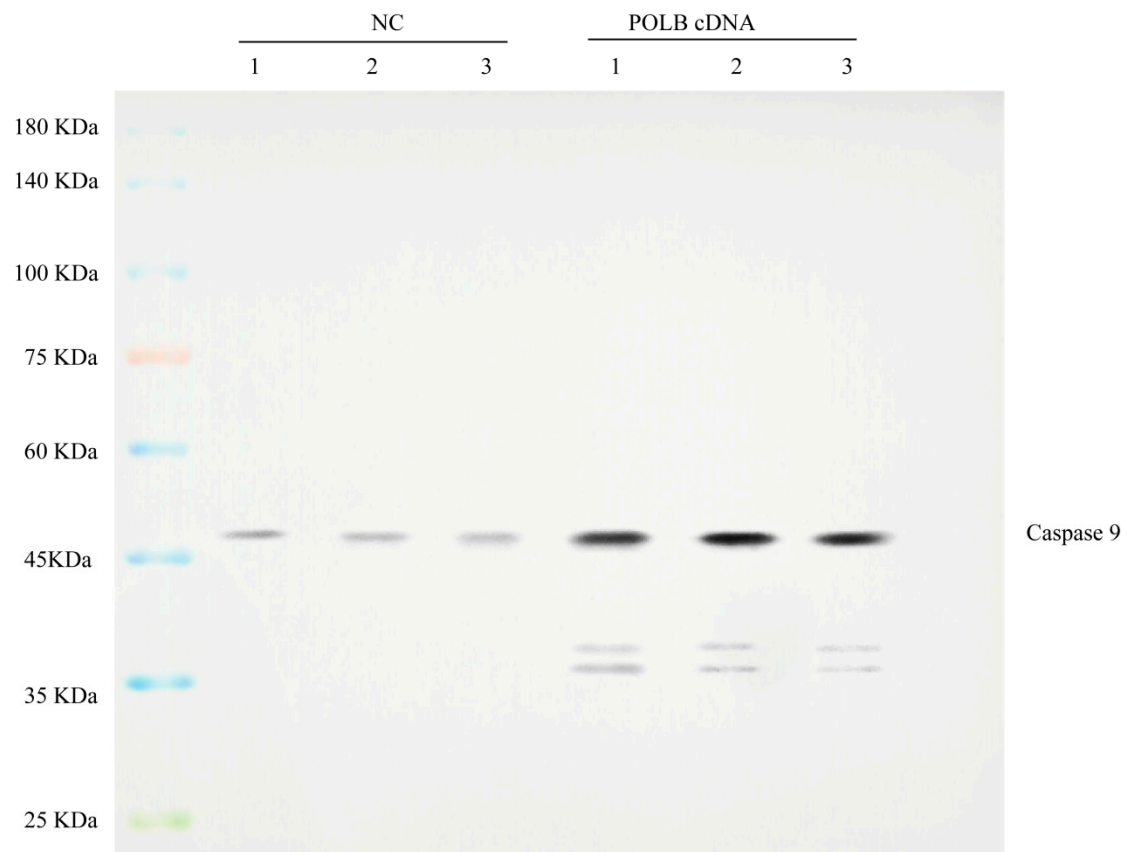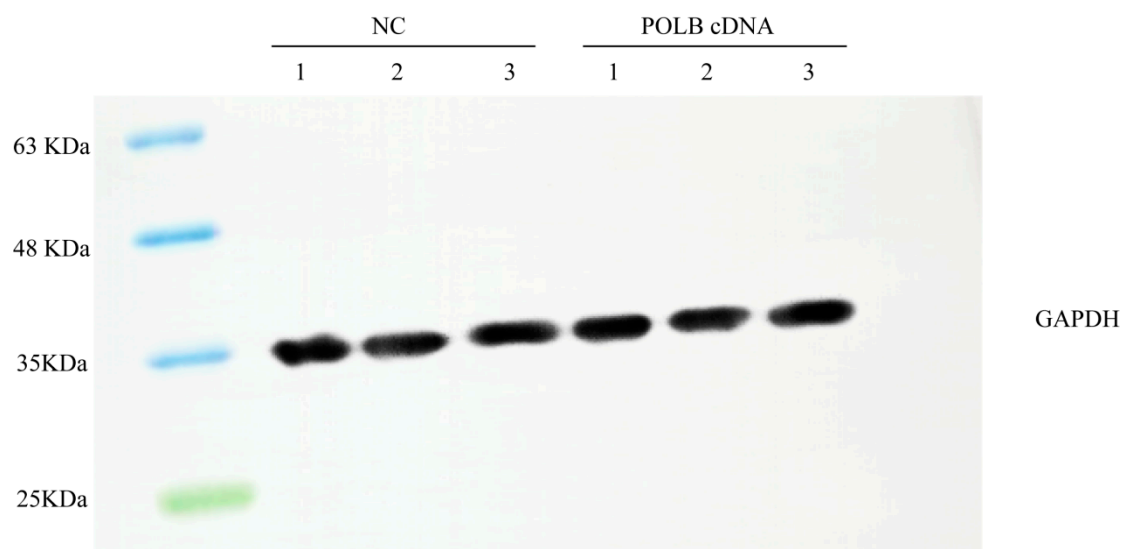

**Figure S5.** Expression changes of Caspase9 and GAPDH proteins with a negative control (NC) and POLB cDNA construct in bovine primary myocytes.
