# Supplementary material for: POLB Regulates Proliferation and Apoptosis of Bovine Primary Myocytes
Source: Animals (Basel). 2024 Apr 28;14(9):1323. doi: 10.3390/ani14091323 (PMC11083859; doi:10.3390/ani14091323)
Supplement: Supplementary file 1 [file animals-14-01323-s001.zip › Gray value.xlsx]

## Sheet: Sheet1
	POLB	GAPDH	POLB/GAPDH	Caspase 9	GAPDH	Caspase 9/GAPDH
POLB cDNA	3284.27	2470.82	1.32922	2185.59	3540.4	0.61733
POLB cDNA NC	1037.46	2476.1	0.418992	844.029	3678.3	0.229462
POLB cDNA	3137.17	2446.33	1.28239	2094.98	3583.85	0.584561
POLB cDNA NC	994.988	2477.32	0.401639	903.107	3627.12	0.248987
POLB cDNA	3092.45	2470.48	1.25176	2231.03	3582.63	0.622737
POLB cDNA NC	993.459	2513.34	0.395274	767.232	3558.26	0.21562
	POLB	GAPDH	POLB/GAPDH
POLB shRNA	401.28	2837.1	0.14144
POLB shRNA NC	1836.85	2844.35	0.64579
POLB shRNA	429.445	2819.27	0.152325
POLB shRNA NC	1791.13	2794.16	0.641028
POLB shRNA	424.295	2824.94	0.150196
POLB shRNA NC	1846.37	2782.34	0.663603
